# Supplementary material
Source: PubMed Central journal article supplement (PMC3146274)
Supplement: ismej20116x1.pdf [file ismej20116x1.pdf]

Supplementary Table 1

| Sample Site | Sample    | Sample    | Dissolved                        | Dissolved                        | Sulfide ( $\mu\text{M}$ ) | Sulfide ( $\mu\text{M}$ ) | T ( $^{\circ}\text{C}$ ) JAN | T ( $^{\circ}\text{C}$ ) MAY | Salinity (‰) | Salinity (‰) |
|-------------|-----------|-----------|----------------------------------|----------------------------------|---------------------------|---------------------------|------------------------------|------------------------------|--------------|--------------|
|             | Depth (m) | Depth (m) | O <sub>2</sub> ( $\mu\text{M}$ ) | O <sub>2</sub> ( $\mu\text{M}$ ) |                           |                           | '05                          | '05                          |              |              |
| Station A   | 240 (A)   | 185 (A)   | 8.43                             | 66.29                            | 0.00                      | 0.00                      | 18.01                        | 18.88                        | 36.429       | 36.563       |
|             | 280 (I)   | 225(I)    | 0.00                             | 8.73                             | 1.05                      | 0.00                      | 17.74                        | 18.05                        | 36.381       | 36.445       |
|             | 320 (B)   | 265 (B)   | 0.00                             | 0.00                             | 3.95                      | 0.63                      | 17.55                        | 17.65                        | 36.346       | 36.373       |
|             | 900 (D)   | 900 (D)   | 0.00                             | 0.00                             | 53.06                     | 51.47                     | 17.18                        | 17.18                        | 36.249       | 36.252       |
| Station B   | 260 (A)   | 216 (A)   | 0.00                             | 12.51                            | 4.03                      | 0.00                      | 17.72                        | 17.99                        | 36.383       | 36.452       |
|             | 300 (I)   | 256 (I)   | 0.00                             | 0.00                             | 4.65                      | 0.32                      | 17.63                        | 17.84                        | 36.365       | 36.422       |
|             | 340 (B)   | 296 (B)   | 0.00                             | 0.00                             | 6.76                      | 4.73                      | 17.51                        | 17.66                        | 36.339       | 36.388       |
|             | 400 (D)   | 670 (D)   | 0.00                             | 0.00                             | 10.90                     | 24.52                     | 17.48                        | n/a                          | 36.332       | n/a          |
| Station C   | 240 (A)   | 230 (A)   | 3.11                             | 23.46                            | 0.00                      | 0.00                      | 17.81                        | 18.05                        | 36.398       | 36.467       |
|             | 280 (I)   | 270 (I)   | 0.00                             | 0.00                             | 0.91                      | 0.09                      | 17.69                        | 17.80                        | 36.376       | 36.419       |
|             | 320 (B)   | 310 (B)   | 0.00                             | 0.00                             | 3.74                      | 1.35                      | 17.56                        | 17.58                        | 36.350       | 36.377       |
|             | 900 (D)   | 900 (D)   | 0.00                             | 0.00                             | 45.28                     | 52.42                     | 17.18                        | 17.19                        | 36.250       | 36.271       |
